# Supplementary material for: Validation of a laboratory spray generation system and its use in a comparative study of hexamethylene diisocyanate (HDI) evaluation methods
Source: Royal Society of Chemistry journal article supplement (doi:10.1039/d4em00513a), 2024-11-04
Supplement: d4em00513a1.zip [file d4em00513a1.zip]

## Sheet: Feuil1
			Position Chambre							concentration mono HDI (mg/m³)												concentration isocyanurate (mg/m³) (ajustement du résultat pour l'exprimer en isocyanurate à partir de l'étalonnage avec le monomère)
identifiant numérique	code unique manip (21_1 à 21_6)	nbre de pulvérisations (nominale, 1 ou 2)	méthode1	méthode2	méthode3	méthode4	conc massique moyenne sur durée	durée effective prélèvement (min)	1 ou 2 ou 3	méthode 1	méthode 1	méthode 1	méthode 2	méthode 2	méthode 3	méthode 3	méthode 3	méthode 4	méthode 4	méthode 4	méthode 4	méthode 1	méthode 1	méthode 1	méthode 2	méthode 2	méthode 3	méthode 3	méthode 3	méthode 4	méthode 4	méthode 4	méthode 4
chrono	manip_origin		Barb	Swin	37	Asset	Frogparticules	duree	replicat
chrono	no_manip	nb_pulv	Pos_Barb	Pos_Swin	Pos_37	Pos_Asset	Conc_Frog	duree	replicat	HDI_Barb	HDI_Barb_F	Moy_HDI_barb_tot	HDI_Swin_F	HDI_Swin_R	HDI_37_F	HDI_37_P	HDI_37_C	HDI_Asset_D1	HDI_Asset_D2	HDI_Asset_F	HDI_Asset_R	IC_Barb	IC_Barb_F	Moy_IC_barb_tot	IC_Swin_F	IC_Swin_R	IC_37_F	IC_37_P	IC_37_C	IC_Asset_D1	IC_Asset_D2	IC_Asset_F	IC_Asset_R
1	21_1	1	9	12	11	14	0.89	7.33	1	0.0241202	0	0.0339105	0.0497024	0	0.0424942	0	0	0.0257288	0.00649468	0.00885918	0	1.66643	0.541638	2.25388	3.80015	0.0332317	1.91197	0.0976593	0.0154347	0.0303343	0.0190435	2.67162	0.0182802
2	21_1	1	15	17	16	19	0.89	7.33	2	0.043104	0	0.0339105	0.0345069	0	0.0411603	0	0	0.0324972	0.00716953	0.0109353	0	1.99702	0.426656	2.25388	2.84608	0.0264676	2.01088	0.129828	0.0148845	0.0325391	0.0218215	2.45084	0.0138541
3	21_1	1	21	23	20	24	0.89	7.33	3	0.0345072	0	0.0339105	0.0345155	0	0.0346793	0	0	0.021127	0.00542836	0.00904184	0	1.58008	0.549799	2.25388	2.51352	0.0208147	1.79023	0.0827426	0.0182299	0.0677254	0.0442801	2.97427	0.0253659
4	21_2	1	11	14	12	9	0.64	7	1	0	0	0.0261954	0.0122841	0	0.0162331	0	0	0.00539141	0	0	0	0.0558652	0.13452	0.745617	0.574974	0.0154935	0.516869	0.0262191	0	0.000204082	0	0.448731	0
5	21_2	1	16	19	17	15	0.64	7	2	0.029395	0	0.0261954	0.0141337	0	0.013041	0	0	0.00898508	0.000456181	0.00080761	0	0.616187	0.118943	0.745617	0.643659	0.0167549	0.596479	0.0260821	0	0.0142122	0.0124258	0.737654	0.0031092
6	21_2	1	23	24	21	20	0.64	7	3	0.0229958	0	0.0261954	0.0126586	0	0.013404	0	0	0.0112925	0.00138667	0.000926179	0	0.616557	0.139547	0.745617	0.553316	0	0.588067	0.0245805	0	1.33709e-05	0	0.88411	0.000581281
7	21_3	1	12	9	14	11	0.37	9.33	1	0.0175412	0	0.0185002	0.0218418	0	0.0222869	0.00843656	0.00506754	0.0176756	0.00554833	0.00534941	0	1.13669	0.344498	1.40899	1.08172	0.0219547	1.17717	0.0545778	0.00504631	0.0115099	0.00948784	1.68659	0.0115946
8	21_3	1	17	15	19	16	0.37	9.33	2	0.0188613	0	0.0185002	0.0227931	0	0.0242007	0.00509632	0.000809729	0.0297691	0.00657166	0.00500513	0	1.25212	0.249395	1.40899	1.18565	0.0109884	1.21882	0.063856	0.00857408	0.0234991	0.0156479	1.71171	0.0203015
9	21_3	1	24	20	23	21	0.37	9.33	3	0.019098	0	0.0185002	0.0264186	0	0.027952	0.00684981	0.00420261	0.0305776	0.00626301	0.00600062	0.000219084	0.966981	0.27728	1.40899	1.21542	0.0347265	1.07629	0.0242561	0	0.0205503	0.0101429	1.39361	0.0214849
10	21_4	2	12	9	14	11	0.37	21.67	1	0.00929737	0	0.00981625	0.00858359	0	0.00880136	0	0	0.00446573	0.000858094	0.000530334	0	0.248346	0.0352051	0.269397	0.273265	0.004401	0.296455	0.00482196	0	0.00216392	0.00194071	0.234227	0.00148757
11	21_4	2	17	15	19	16	0.37	21.67	2	0.0100406	0	0.00981625	0.00765583	0	0.00781836	0	0	0.00612515	0.00135395	0.00144642	0	0.286418	0	0.269397	0.309319	0	0.327523	0.00334935	0.00417228	0.00109131	0.000585951	0.447777	0.0062638
12	21_4	2	24	20	23	21	0.37	21.67	3	0.0101108	0	0.00981625	0.00738973	0	0	0	0	0.00743017	0.00171973	0.00131641	0	0.206413	0.0318075	0.269397	0.341031	0.0114472	0.000607319	0.0125913	0.00438676	0.00101545	0.000444162	0.346848	0.00472671
13	21_5	2	14	11	15	12	0.46	17.17	1	0.013511	0	0.0130804	0.00891624	0	0.01167	0	0	0.00674569	0.00151173	0.00140113	0	0.374017	0.0617793	0.455094	0.432539	0.0105006	0.451551	0.0168413	0.00427131	0.00186021	0.00162812	0.447632	0.00769104
14	21_5	2	19	16	20	17	0.46	17.17	2	0.013758	0	0.0130804	0.0101139	0	0.0113976	0.00353637	0	0.0107058	0.00242034	0.00225551	0	0.496472	0.0475425	0.455094	0.50967	0.0238393	0.501293	0.0133797	0	0.00804774	0.00941923	0.831925	0.016007
15	21_5	2	9	21	24	23	0.46	17.17	3	0.0119723	0	0.0130804	0.0102945	0	0.010347	0	0	0.00770916	0.00220181	0.0016839	0	0.332057	0.0534142	0.455094	0.505382	0.0236981	0.3333	0.0105463	0	0.000969535	0.0024979	0.470898	0.00417179
16	21_6	2	11	12	9	14	0.31	16.17	1	0.0131561	0	0.0131532	0.0141921	0	0.0150892	0.00502876	0.00309569	0.0120008	0.00422946	0.00427229	0.000553884	0.524222	0.0836812	0.682066	0.756904	0.0178263	0.485197	0.00774348	0	0.00156679	0.00254096	0.49779	0.00487959
17	21_6	2	15	17	16	19	0.31	16.17	2	0.0106044	0	0.0131532	0.0155934	0	0.0178592	0.00454066	0.00354658	0.0154167	0.00485222	0.00502958	0.000477806	0.57031	0.0459173	0.682066	0.791315	0.0323347	0.804952	0.0329108	0.00862869	0.00240877	0.00126017	1.00855	0.0148625
18	21_6	2	20	23	21	24	0.31	16.17	3	0.0119865	0.00371254	0.0131532	0.0167727	0	0.0160098	0.003657	0.00416142	0.0121692	0.00311012	0.00350384	5.4988e-05	0.72901	0.0930581	0.682066	0.695794	0.0584675	0.747683	0.0451327	0.0150448	0.0019301	0.00118202	0.433466	0.00411203
